# Supplementary material for: A mixed-modeling framework for analyzing multitask whole-brain network data
Source: PubMed Central journal article supplement (PMC6370463; doi:10.1162/netn_a_00065), 2019-02-01
Supplement: netn-03-307-s001.pdf [file netn-03-307-s001.pdf]

## Appendix S1: Macro for model fitting

```

/*****
/* The syntax for the macro is:
/*
/* %mixnet (data= ,response= ,COIcovars= ,CONcovars= ,NETcovars= ,
/*             INTcovars,Bin_REs,Cont_REs,subject),
/*
/*
/* "data" specifies the dataset to be used
/* "response" specifies the Y (outcome) variable
/* "COIcovars" list of the covariates of interest
/* "CONcovars" list of the confounding covariates
/* "NETcovars" list of the network covariates
/* "INTcovars" list of the interaction covariates
/* "Bin_REs " list of random effects statements for Part I model
/* "Cont_REs" list of random effects statements for Part II model
/* "subject" variable that indicates the subject id
/*
*****/

%macro mixnet(data,response,COIcovars,CONcovars,NETcovars,INTcovars,Bin_REs,
              Cont_REs,subject);

data data_b;
  set &data;
  if &response=0 then YN=0;
  else if &response>0 then YN=1;
run;

data data_n;
  set &data;
  if &response>0;
run;

proc sort data=data_b; by &subject; run;
proc sort data=data_n; by &subject; run;

/*Binomial Model*/
%hpglmixmap(data=data_b,
  stmts=%str(class &COIcovars &subject;
              model yn = &COIcovars &CONcovars &NETcovars &INTcovars/solution;
              &Bin_REs; ods output covparms=covpb;),error=binary)
run;

data covpb_new;
  set covpb;
  if covparm ne "Residual";
run;

proc glimmix data = data_b;
  class &COIcovars (ref=first);
  model yn (desc)= &COIcovars &CONcovars &NETcovars &INTcovars
    /dist=binary ddfm=residual solution;
  &Bin_REs;
  parms/pdata=covpb_new noiter;
run;

```

```

/*Normal Model*/
proc hpmixed data = data_n noclprint;
  class &COIcovars;
  model n_ajj = &COIcovars &CONcovars &NETcovars &INTcovars /solution;
  &Cont_REs;
  ods output covparms=covpn;
run;

proc glimmix data = data_n noprofile;
  class &COIcovars (ref=first);
  model n_ajj = &COIcovars &CONcovars &NETcovars &INTcovars
    /dist=n ddfm=residual solution;
  &Cont_REs;
  parms/pdata=covpn_new noiter;
run;

%mend;

```

### **Defining Random Effects Statements (example for Rest/Visual Model)**

```

%let Bin_RE1 = int visual;
%let Cont_RE1 = int visual;
%let Bin_RE2 = cent_clust_avg visual*cent_clust_avg;
%let Cont_RE2 = cent_clust_avg visual*cent_clust_avg;
%let Bin_RE3 = cent_eglob_avg visual*cent_eglob_avg;
%let Cont_RE3 = cent_eglob_avg visual*cent_eglob_avg;
%let Bin_RE4 = cent_deg_diff visual*cent_deg_diff;
%let Cont_RE4 = cent_deg_diff visual*cent_deg_diff;
%let Bin_RE5 = cent_lev_avg visual*cent_lev_avg;
%let Cont_RE5 = cent_lev_avg visual*cent_lev_avg;
%let Bin_RE6 = cent_distance visual*cent_distance;
%let Cont_RE6 = cent_distance visual*cent_distance;
%let Bin_RE7 = cent_distance_2 visual*cent_distance_2;
%let Cont_RE7 = cent_distance_2 visual*cent_distance_2;

*Random Effects Statements;
%macro RandomEffectsStatements(NumberOfNodes, StatementNumber);
  %do i = 1 %to &NumberOfNodes;
    %let j = %eval(&i+7);
    %let Bin_RE&j = NodeInd_&i visual*NodeInd_&i;
    %let Cont_RE&j = NodeInd_&i visual*NodeInd_&i;
  %end;
  %do i = 1 %to &StatementNumber;
    %let Bin_REState&i = random &Bin_RE&i/
      sub=%str(&subject) type=chol group=%str(&COIcovars);
    %let Cont_REState&i = random &Cont_RE&i/
      sub=%str(&subject) type=chol group=%str(&COIcovars);
  %end;

```
