# Supplementary material for: A mixed-modeling framework for analyzing multitask whole-brain network data
Source: PubMed Central journal article supplement (PMC6370463; doi:10.1162/netn_a_00065), 2019-02-01
Supplement: netn-03-307-s002.pdf [file netn-03-307-s002.pdf]

Simpson, S. L., Bahrami, M., & Laurienti, P. J. (2019). Supporting information for "A mixed modeling framework for analyzing multitask whole-brain network data." *Network Neuroscience*, 3(2), 307–324. [https://doi.org/10.1162/netn\\_a\\_00065](https://doi.org/10.1162/netn_a_00065)

1 *1. More accurate and precise within-task results*

4 1. Clustering coefficient (functional segregation/regional specificity) is shown to play an even greater role  
5 in explaining the connectivity (presence) between two regions at rest for both young and older adults as  
6 indicated by the change in the order of magnitude of  $\beta_{rl_1,C}$ , the increase in  $(\beta_{rl_1,C} + \beta_{rl_1,age \times C})$ , and the  
7 change in two orders of magnitude of the p-value for  $\beta_{r,C}$ . Additionally, the change in sign of  $\beta_{rl_1,age \times C}$   
8 provides (weak) evidence that older adults have a weaker relationship between clustering and  
9 connectivity than young adults, whereas the opposite conclusion results from the unitask model fit.

10 2. The change in sign of  $\beta_{rl_1,Q}$  and  $\beta_{rl_1,age \times Q}$  provides (weak) evidence that the relationship between  
11 modularity and connectivity is actually the inverse of the one estimated by the unitask model for both  
12 young and older adults.

13 3. The change in sign of  $\beta_{rl_1,age \times l}$  provides (weak) evidence that older adults have a weaker relationship  
14 between leverage centrality and connectivity than young adults, whereas the opposite conclusion results  
15 from the unitask model fit.

16 4. Modularity is shown to have an even stronger negative relationship with connection strength for young  
17 adults as evidenced by the change in the order of magnitude of  $\beta_{sl_1,Q}$  and the 81% reduction in its  
18 associated p-value. Additionally, older adults are no longer estimated to have a stronger negative  
19 relationship between modularity and connection strength than young adults as indicated by the two  
20 orders of magnitude increase in the p-value associated with  $\beta_{sl_1,age \times Q}$ .

21 5. The change in the p-value associated with  $\beta_{sl_1,age \times C}$  from significant to non-significant implies that  
22 there **is not** evidence of a different relationship between clustering and connection strength for older  
23 adults than young adults at rest as concluded from the unitask model fit.

24 6. The change in sign of  $\beta_{sl_1,age \times k}$  provides (weak) evidence that the brain networks of older adults are  
25 actually more degree assortative (in terms of connection strength) than young adults at rest, not less as the  
26 unitask model indicates.

2 **Supplementary Table 1.** Aging data: estimates, standard errors (se), and p-values for the original univariate mixed model fit to Rest data and new multivariate  
 3 fit to Rest (and Multisensory) data.

| Parameter                       | Rest (Univariate)   |          |        | <sup>a</sup> Rest (with MS) |                |         |               |
|---------------------------------|---------------------|----------|--------|-----------------------------|----------------|---------|---------------|
|                                 | $l_1 = \text{rest}$ | Estimate | SE     | *P-value                    | Estimate       | SE      | *P-value      |
| $\beta_{rl_1,0}$                |                     | -0.3141  | 0.0569 | < 0.0001                    | -0.2614        | 0.0467  | < 0.0001      |
| $\beta_{rl_1,C}$                |                     | 0.7807   | 0.3424 | 0.0355                      | <b>7.2829</b>  | 1.7689  | <b>0.0001</b> |
| $\beta_{rl_1,Eglob}$            |                     | 32.6231  | 2.3322 | < 0.0001                    | 30.8250        | 1.4366  | < 0.0001      |
| $\beta_{rl_1,k}$                |                     | -1.4442  | 0.1522 | < 0.0001                    | -1.5301        | 0.1748  | < 0.0001      |
| $\beta_{rl_1,Q}$                |                     | -0.7345  | 1.1361 | 0.5179                      | <b>0.1268</b>  | 0.9497  | 0.8938        |
| $\beta_{rl_1,l}$                |                     | 1.1598   | 0.0785 | < 0.0001                    | 1.3945         | 0.0861  | < 0.0001      |
| $\beta_{rl_1,age}$              |                     | -0.0438  | 0.0773 | 0.5709                      | -0.0906        | 0.0779  | 0.2568        |
| $\beta_{rl_1,sex}$              |                     | -0.0085  | 0.0825 | 0.9178                      | -0.0147        | 0.0686  | 0.8304        |
| $\beta_{rl_1,educ}$             |                     | 0.0027   | 0.0103 | 0.7954                      | 0.0032         | 0.0098  | 0.7437        |
| $\beta_{rl_1,dist}$             |                     | -1.4266  | 0.0572 | < 0.0001                    | -1.4582        | 0.0517  | < 0.0001      |
| $\beta_{rl_1,dist^2}$           |                     | 2.6558   | 0.1417 | < 0.0001                    | 2.6559         | 0.1147  | < 0.0001      |
| $\beta_{rl_1,age \times C}$     |                     | 1.1249   | 0.7986 | 0.1943                      | <b>-1.8954</b> | 2.3517  | 0.4203        |
| $\beta_{rl_1,age \times Eglob}$ |                     | -1.7255  | 3.3478 | 0.6063                      | -0.4546        | 2.6167  | 0.8621        |
| $\beta_{rl_1,age \times k}$     |                     | 0.2455   | 0.2185 | 0.2873                      | 0.2536         | 0.2253  | 0.2603        |
| $\beta_{rl_1,age \times Q}$     |                     | 1.5858   | 1.5753 | 0.3141                      | <b>-0.9548</b> | 1.4523  | 0.5109        |
| $\beta_{rl_1,age \times l}$     |                     | 0.0638   | 0.1154 | 0.5803                      | <b>-0.0736</b> | 0.1438  | 0.6088        |
| $\beta_{rl_1,age \times sex}$   |                     | 0.1914   | 0.1145 | 0.1301                      | 0.2173         | 0.1164  | 0.0814        |
| $\beta_{sl_1,0}$                |                     | 0.2290   | 0.0091 | < 0.0001                    | 0.2317         | 0.01106 | < 0.0001      |
| $\beta_{sl_1,C}$                |                     | 2.2940   | 0.2428 | < 0.0001                    | 2.2510         | 0.1776  | < 0.0001      |
| $\beta_{sl_1,Eglob}$            |                     | 0.9534   | 0.1823 | < 0.0001                    | 1.0508         | 0.1833  | < 0.0001      |
| $\beta_{sl_1,k}$                |                     | -0.2524  | 0.0153 | < 0.0001                    | -0.2445        | 0.0139  | < 0.0001      |
| $\beta_{sl_1,Q}$                |                     | -0.0373  | 0.1723 | 0.8285                      | <b>-0.2990</b> | 0.1611  | <b>0.1613</b> |
| $\beta_{sl_1,l}$                |                     | -0.0036  | 0.0109 | 0.7426                      | -0.0039        | 0.0124  | 0.7550        |

29 **Supplementary Table 2.** Aging data (multivariate Rest/MS fit): estimates for Multisensory and Rest, and estimates, standard errors (se), and p-values for  
 30 the between-task differences.

| Parameter                    | MS       | Rest     | <sup>a</sup> Difference (MS - Rest) |           |               |
|------------------------------|----------|----------|-------------------------------------|-----------|---------------|
|                              | Estimate | Estimate | Estimate                            | SE        | *P-value      |
| $\beta_{r,0}$                | -0.0813  | -0.2614  | 0.1801                              | 0.0842    | <b>0.0588</b> |
| $\beta_{r,C}$                | 13.2286  | 7.2829   | 5.9457                              | 1.5744    | <b>0.0004</b> |
| $\beta_{r,Eglob}$            | 34.537   | 30.8250  | 3.7120                              | 2.5545    | 0.1706        |
| $\beta_{r,k}$                | -2.2216  | -1.5301  | -0.6915                             | 0.2384    | <b>0.0078</b> |
| $\beta_{r,Q}$                | -3.2427  | 0.1268   | -3.3695                             | 2.2266    | 0.1608        |
| $\beta_{r,l}$                | 1.5428   | 1.3945   | 0.1483                              | 0.0723    | <b>0.0648</b> |
| $\beta_{r,age}$              | 0.0098   | -0.0906  | 0.1004                              | 0.1172    | 0.3918        |
| $\beta_{r,sex}$              | -0.0326  | -0.0147  | -0.0179                             | 0.1311    | 0.8912        |
| $\beta_{r,educ}$             | 0.0189   | 0.0032   | 0.0157                              | 0.0174    | 0.3676        |
| $\beta_{r,dist}$             | -1.5237  | -1.4582  | -0.0655                             | 0.0616    | 0.2878        |
| $\beta_{r,dist^2}$           | 3.0478   | 2.6559   | 0.3919                              | 0.1977    | <b>0.0664</b> |
| $\beta_{r,age \times C}$     | -9.3597  | -1.8954  | -7.4643                             | 2.4526    | <b>0.0055</b> |
| $\beta_{r,age \times Eglob}$ | -3.3786  | -0.4546  | -2.9240                             | 3.0551    | 0.3385        |
| $\beta_{r,age \times k}$     | 0.8434   | 0.2536   | 0.5898                              | 0.2776    | <b>0.0588</b> |
| $\beta_{r,age \times Q}$     | 4.9509   | -0.9548  | 5.9057                              | 2.9792    | <b>0.0664</b> |
| $\beta_{r,age \times l}$     | -0.2156  | -0.0736  | -0.1420                             | 0.1083    | 0.2096        |
| $\beta_{r,age \times sex}$   | 0.1027   | 0.2173   | -0.1146                             | 0.1841    | 0.5336        |
| $\beta_{s,0}$                | 0.2271   | 0.2317   | -0.0046                             | 0.0118    | 0.7111        |
| $\beta_{s,C}$                | 1.9784   | 2.2510   | -0.2726                             | 0.2313    | 0.4454        |
| $\beta_{s,Eglob}$            | 1.2290   | 1.0508   | 0.1782                              | 0.2376    | 0.6347        |
| $\beta_{s,k}$                | -0.2645  | -0.2445  | -0.0200                             | 0.0141    | 0.3662        |
| $\beta_{s,Q}$                | -0.2540  | -0.2990  | 0.0450                              | 0.3275_3_ | 0.8907        |
| $\beta_{s,l}$                | -0.0108  | -0.0039  | -0.0069                             | 0.0124    | 0.7034        |

31

**Supplementary Table 3.** Aging data: variance estimates for random effects (excluding propensities) for the Rest and Multisensory data fit.

| Parameter               | Variance Estimate |          |          |          |
|-------------------------|-------------------|----------|----------|----------|
|                         | Rest              |          | Task     |          |
|                         | Young             | Older    | Young    | Older    |
| $\mathbf{b}_{ri,0}$     | 0.01388           | 0.03261  | 0.05121  | 0.05565  |
| $\mathbf{b}_{ri,C}$     | 47.30740          | 29.17890 | 1.24400  | 27.14320 |
| $\mathbf{b}_{ri,Eglob}$ | 29.53790          | 77.37150 | 99.67160 | 22.66260 |
| $\mathbf{b}_{ri,k}$     | 0.58320           | 0.35250  | 1.06640  | 0.31590  |
| $\mathbf{b}_{ri,l}$     | 0.11070           | 0.21230  | 0.01208  | 0.02208  |
| $\mathbf{b}_{si,0}$     | 0.00097           | 0.00031  | 0.00102  | 0.00071  |
| $\mathbf{b}_{si,C}$     | 0.38000           | 0.54220  | 0.29610  | 0.00471  |
| $\mathbf{b}_{si,Eglob}$ | 0.49290           | 0.13280  | 0.68300  | 0.06874  |
| $\mathbf{b}_{si,k}$     | 0.00336           | 0.00419  | 0.00281  | 0.00488  |
| $\mathbf{b}_{si,l}$     | 0.00250           | 0.00044  | 0.00169  | 0.00014  |

27 *2. Assess population network differences and individual variability in network differences within and*  
28 *between tasks*

32 Below we highlight significant population network changes and variability differences (deviations from  
33 populations) for rest-multisensory task pairs gleaned from the last three columns of Supplementary Table  
34 2 (bolded p-values) and Supplementary Table 3.

35 1. Young and older adults gain connections (presence) (i.e., have more dense networks) when comparing  
36 their multisensory-state to resting-state networks [Variability: Older adults have more variability in their  
37 density than young adults during both rest and the multisensory task. However, the variability of young  
38 adults increases more than older adults when comparing their multisensory-state to resting-state  
39 networks].

40 2. Clustering (functional segregation/regional specificity) plays an even greater role in explaining the  
41 connectivity (presence) between two regions for young adults when comparing their multisensory-state to  
42 resting-state networks, whereas it plays less of a role for older adults [Variability: Young adults have  
43 more variability in the clustering/presence relationship than older adults at rest, but this variability drops  
44 by more than an order of magnitude when comparing their multisensory-state to resting-state networks,  
45 whereas the variability of older adults remains essentially the same.].

46 3. Young adults become more degree assortative (presence) when comparing their multisensory-state to  
47 resting-state networks, whereas older adults do not [Variability: Greater increase in variability (presence)  
48 in assortativity for young adults than older adults when comparing their multisensory-state to  
49 resting-state networks (variability of older adults actually decreases)].

50 4. Leverage centrality plays more of a role in explaining the connectivity (presence) between two regions  
51 for young adults when comparing their multisensory-state to resting-state networks, whereas it does not  
52 for older adults [Variability: Older adults have more variability in the LC/presence relationship than  
53 young adults during both rest and the multisensory task. The variability in this relationship drops by an  
54 order of magnitude when comparing multisensory-state to resting-state networks for both older and  
55 young adults.].

56 5. Older adults have relatively denser networks as their brains become more modular when comparing  
57 their multisensory-state to resting-state networks, whereas young adults do not.

58 - To clarify, this result does not mean that older adult brains become more modular than young adult brains when  
59 comparing their multisensory-state to resting-state networks, just that at the same level of modularity older adults  
60 have denser networks and become denser at a faster rate as their modularity increases. That is, for older adults,  
61 becoming more modular comes at the expense of a relative increase in wiring cost, a cost that young adults do not  
62 incur.

63 6. Brain regions farther apart in distance tend to have relatively weaker connections when comparing  
64 multisensory-state to resting-state networks for both age groups.

65 7. Older adults have an overall (across all random effects) decrease in variability when comparing their  
66 multisensory-state to resting-state networks, whereas young adults have an increase in variability.

67 Conclusion: Similar (though not identical) to what was observed when comparing visual to rest, young  
68 adults' brains shift to a functional architecture comprising a resilient core of interconnected  
69 high-degree/locally efficient hubs when comparing their multisensory-state to resting-state networks, but  
70 wiring cost is increased some to accomplish this, likely due to the additional inter-module connectivity  
71 needed for a multisensory task (as opposed to a unisensory visual task). This shift does not occur for  
72 older adults, but they do also experience an increase in wiring cost (i.e., their networks become more  
73 densely connected with random connections). The relative lack of a shift towards a resilient core of  
74 interconnected high-degree/locally efficient hubs suggests that a rest to multisensory task transition does  
75 not increase the connectivity within the task-relevant networks as much for older adults. This finding is  
76 again consistent with the cognitive studies showing the vulnerability of older adults to distraction when  
77 performing tasks. These results are visually depicted in Supplementary Figure 1 which shows two sets of  
78 cartoon brain networks that illustrate the differences found between the brain networks in young and  
79 older adults when comparing their multisensory-state to resting-state networks. Additionally, the degree  
80 (strength) assortativity differences are shown in the 95% prediction intervals of Supplementary Figure 2.  
81 While the differences between the two groups were not significant, the predicted strength change is  
82 initially higher for young adults and then has a faster decay than for older adults as the disparity between  
83 the degrees of two nodes increases, thus implying a trend towards assortativity differences.

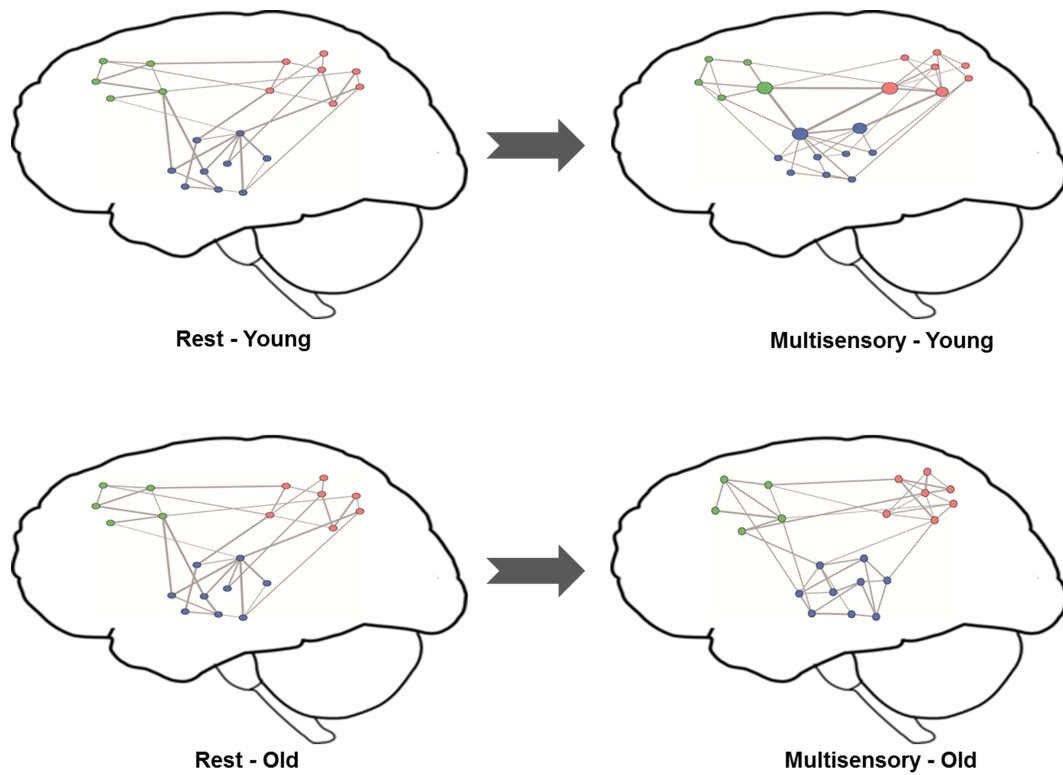

84 **Supplementary Figure 1.** Cartoon depiction of important differences found between the brain networks in young and older adults when comparing their  
 85 multisensory-state to resting-state networks. Each network node represents a brain region and the lines represent functional connections. The node color  
 86 indicates the module membership and the edge thickness represents connection strength (stronger connections are shown with thicker edges). Young adults’  
 87 brains shift to a functional architecture comprising a resilient core of interconnected high-degree/locally efficient hubs when comparing their multisensory-state  
 88 to resting-state networks, but wiring cost is increased some to accomplish this. This shift does not occur for older adults, but they do also experience an increase  
 89 in wiring cost (i.e., their networks become more densely connected with random connections).

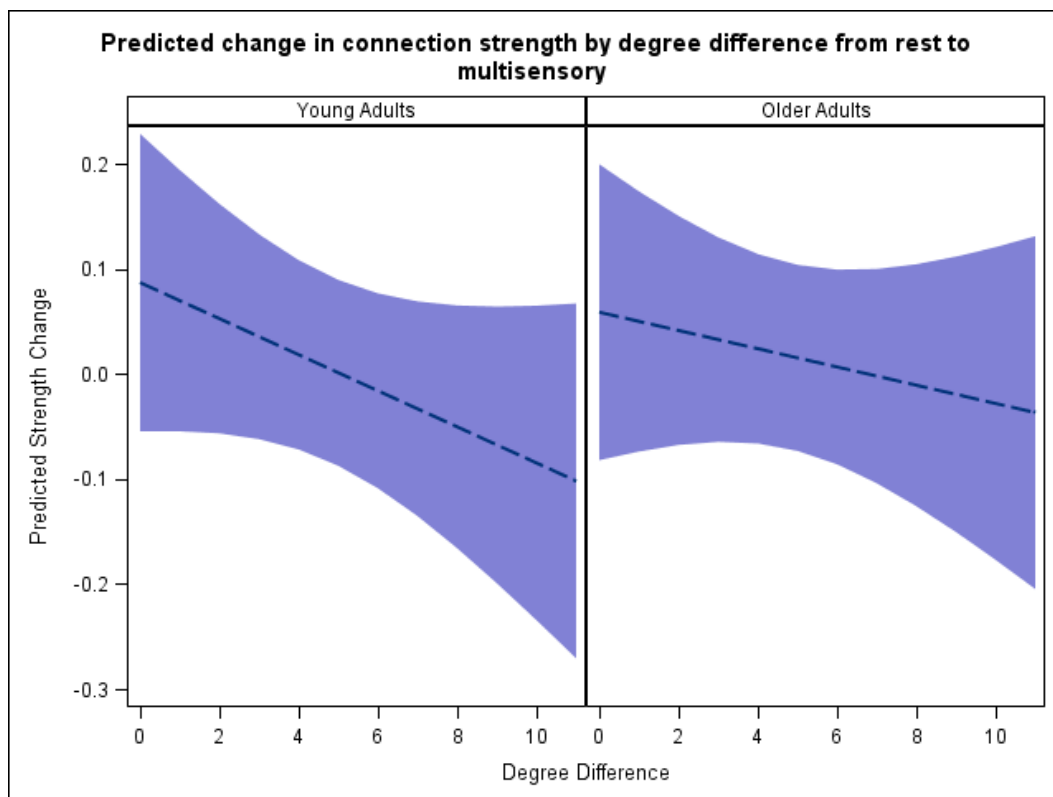

90 **Supplementary Figure 2.** Prediction intervals for rest-to-multisensory changes in connection strength as a function of degree difference in young and older  
91 participants.
